# Supplementary material
Source: MDPI journal article supplement (https://www.mdpi.com/1424-8247/16/6/867)
Supplement: s1 [file s1]

## Supplementary material

**Table S1. Search strategy**

|                                                                                                                                                                                                                                                                                                                                                                                                                                                                                                                                                                                                                                                                                                                                                                    |
|--------------------------------------------------------------------------------------------------------------------------------------------------------------------------------------------------------------------------------------------------------------------------------------------------------------------------------------------------------------------------------------------------------------------------------------------------------------------------------------------------------------------------------------------------------------------------------------------------------------------------------------------------------------------------------------------------------------------------------------------------------------------|
| PUBMED                                                                                                                                                                                                                                                                                                                                                                                                                                                                                                                                                                                                                                                                                                                                                             |
| (anti-VEGF or "antiangiogenic" or "anti-angiogenic" or bevacizumab or sorafenib or sunitinib or cabozatinib or propranolol or axitinib or aflibercept or dovitinib or lenvatinib or nintedanib or pazopanib or ponatinib or ramucirumab or regorafenib or rivoceranib or tivozanib or trebananib or vandetanib) AND (pharmacovigilance OR "spontaneous reporting system" OR pharmacovigilance[mesh] or pharmaco-vigilance OR vigibase OR faers OR eudravigilance OR "spontaneous reporting"[title/abstract] OR "case/non-case") AND (Tumor or cancer or tumors or cancers or tumor[mesh]) NOT ("Phase I"[title] OR "Phase 1"[ title] OR "Phase II"[ title] OR "Phase III"[ title] OR "Phase 2"[ title] OR "Phase 3"[ title] OR "clinical trial"[publication type]) |
| WEB OF KNOWLEDGE                                                                                                                                                                                                                                                                                                                                                                                                                                                                                                                                                                                                                                                                                                                                                   |
| All fields: anti-VEGF or "antiangiogenic" or "anti-angiogenic" or bevacizumab or sorafenib or sunitinib or cabozatinib or propranolol or axitinib or aflibercept or dovitinib or lenvatinib or nintedanib or pazopanib or ponatinib or ramucirumab or regorafenib or rivoceranib or tivozanib or trebananib or vandetanib<br>AND all fields: pharmacovigilance OR "spontaneous reporting system" OR pharmaco-vigilance OR vigibase OR faers OR eudravigilance OR "spontaneous reporting" OR "case/non-case"<br>AND all fields: tumor or cancer or tumors or cancers<br>NOT title: "Phase I" or "Phase 1" OR "Phase II" OR "Phase III" OR "Phase 2" OR "Phase 3"                                                                                                    |

# Figure S1

## Summary of disproportionality analysis for drugs included in the study

| Reference                    | ADR                           | Database                             | Drug                   | Type of analysis | Disproportionality value                  | 95% CI LOW | 95% CI UP | Time to onset (days) | Range |      |                                |
|------------------------------|-------------------------------|--------------------------------------|------------------------|------------------|-------------------------------------------|------------|-----------|----------------------|-------|------|--------------------------------|
| Cheng et al., 2021           | Arterial aneurysm/dissection  | FAERS                                | Axitinib               |                  | Descriptive                               |            |           | 92                   |       | 1564 |                                |
| Cheng et al., 2021           | Arterial aneurysm/dissection  | FAERS                                | Bevacizumab            |                  | Descriptive                               |            |           | 97                   | 1     | 1955 |                                |
| Cheng et al., 2021           | Arterial aneurysm/dissection  | FAERS                                | Cabozantinib           |                  | Descriptive                               |            |           | 38                   |       | N/A  |                                |
| Cheng et al., 2021           | Arterial aneurysm/dissection  | FAERS                                | Lemnatinib             |                  | Descriptive                               |            |           | 82                   | 1     | 371  |                                |
| Cheng et al., 2021           | Arterial aneurysm/dissection  | FAERS                                | Pazopanib              |                  | Descriptive                               |            |           | 57                   | 26    | 95   |                                |
| Cheng et al., 2021           | Arterial aneurysm/dissection  | FAERS                                | Ponatinib              |                  | Descriptive                               |            |           | 220                  | 5     | 616  |                                |
| Cheng et al., 2021           | Arterial aneurysm/dissection  | FAERS                                | Ramucicromab           |                  | Descriptive                               |            |           | 60                   | 2     | 260  |                                |
| Cheng et al., 2021           | Arterial aneurysm/dissection  | FAERS                                | Regorafenib            |                  | Descriptive                               |            |           | 40                   | 14    | 117  |                                |
| Cheng et al., 2021           | Arterial aneurysm/dissection  | FAERS                                | Sorafenib              |                  | Descriptive                               |            |           | 81                   | 15    | 913  |                                |
| Cheng et al., 2021           | Arterial aneurysm/dissection  | FAERS                                | Sunitinib              |                  | Descriptive                               |            |           | 166                  | 7     | 1416 |                                |
| Cheng et al., 2021           | Arterial aneurysm/dissection  | FAERS                                | Vandetanib             |                  | Descriptive                               |            |           | 1                    |       | N/A  |                                |
| Cheng et al., 2021           | Arterial aneurysm/dissection  | FAERS                                | ziv-aflibercept        |                  | Descriptive                               |            |           | 21                   | 14    | 216  |                                |
| Goldman et al., 2021         | Arterial aneurysm/dissection  | FAERS                                | Axitinib               | ROR              | 4.45                                      | 2.13       | 9.4       |                      |       |      |                                |
| Goldman et al., 2021         | Arterial aneurysm/dissection  | FAERS                                | Cabozantinib           | ROR              | 0.27                                      | 0.04       | 1.9       |                      |       |      |                                |
| Goldman et al., 2021         | Arterial aneurysm/dissection  | FAERS                                | Lemnatinib             | ROR              | 7.14                                      | 4.22       | 12.08     |                      |       |      |                                |
| Goldman et al., 2021         | Arterial aneurysm/dissection  | FAERS                                | Pazopanib              | ROR              | 1.12                                      | 0.5        | 2.51      |                      |       |      |                                |
| Goldman et al., 2021         | Arterial aneurysm/dissection  | FAERS                                | Sunitinib              | ROR              | 6.16                                      | 4.37       | 8.7       | 95*                  | 22.5  | 366  | *not specified for single drug |
| Guyon et al., 2021           | Arterial aneurysm/dissection  | VigiBase                             | Axitinib               | PRR              | 2.52                                      | 1.51       | 4.19      | NR                   | NR    | NR   |                                |
| Guyon et al., 2021           | Arterial aneurysm/dissection  | VigiBase                             | Bevacizumab            | PRR              | 4.98                                      | 3.54       | 4.7       | NR                   | NR    | NR   |                                |
| Guyon et al., 2021           | Arterial aneurysm/dissection  | VigiBase                             | Cabozantinib           | PRR              | 2.25                                      | 1.24       | 4.07      | NR                   | NR    | NR   |                                |
| Guyon et al., 2021           | Arterial aneurysm/dissection  | VigiBase                             | Lemnatinib             | PRR              | 4.17                                      | 2.3        | 7.56      | NR                   | NR    | NR   |                                |
| Guyon et al., 2021           | Arterial aneurysm/dissection  | VigiBase                             | Nintedanib             | PRR              | 2.08                                      | 1.27       | 3.4       | NR                   | NR    | NR   |                                |
| Guyon et al., 2021           | Arterial aneurysm/dissection  | VigiBase                             | Pazopanib              | PRR              | 1.57                                      | 1.11       | 2.33      | NR                   | NR    | NR   |                                |
| Guyon et al., 2021           | Arterial aneurysm/dissection  | VigiBase                             | Ramucicromab           | PRR              | 3.34                                      | 1.89       | 5.9       | NR                   | NR    | NR   |                                |
| Guyon et al., 2021           | Arterial aneurysm/dissection  | VigiBase                             | Sunitinib              | PRR              | 2.38                                      | 1.87       | 3.01      | NR                   | NR    | NR   |                                |
| Wang et al., 2021            | Arterial aneurysm/dissection  | FAERS                                | Aflibercept            | ROR              | 1.21                                      | 0.86       | 1.7       | NR                   | NR    | NR   |                                |
| Wang et al., 2021            | Arterial aneurysm/dissection  | FAERS                                | Axitinib               | ROR              | 1.25                                      | 0.74       | 2.11      | NR                   | NR    | NR   |                                |
| Wang et al., 2021            | Arterial aneurysm/dissection  | FAERS                                | Bevacizumab            | ROR              | 3.05                                      | 2.67       | 3.48      | NR                   | NR    | NR   |                                |
| Wang et al., 2021            | Arterial aneurysm/dissection  | FAERS                                | Cabozantinib           | ROR              | 0.61                                      | 0.34       | 1.07      | NR                   | NR    | NR   |                                |
| Wang et al., 2021            | Arterial aneurysm/dissection  | FAERS                                | Lemnatinib             | ROR              | 3                                         | 2.11       | 4.28      | NR                   | NR    | NR   |                                |
| Wang et al., 2021            | Arterial aneurysm/dissection  | FAERS                                | Nintedanib             | ROR              | 2.12                                      | 1.43       | 3.14      | NR                   | NR    | NR   |                                |
| Wang et al., 2021            | Arterial aneurysm/dissection  | FAERS                                | Pazopanib              | ROR              | 0.61                                      | 0.39       | 0.95      | NR                   | NR    | NR   |                                |
| Wang et al., 2021            | Arterial aneurysm/dissection  | FAERS                                | Pegaptanib             | ROR              | 1.49                                      | 0.21       | 10.64     | NR                   | NR    | NR   |                                |
| Wang et al., 2021            | Arterial aneurysm/dissection  | FAERS                                | Ponatinib              | ROR              | 2.03                                      | 1.01       | 4.06      | NR                   | NR    | NR   |                                |
| Wang et al., 2021            | Arterial aneurysm/dissection  | FAERS                                | Ramucicromab           | ROR              | 3.68                                      | 2.18       | 6.23      | NR                   | NR    | NR   |                                |
| Wang et al., 2021            | Arterial aneurysm/dissection  | FAERS                                | Regorafenib            | ROR              | 0.79                                      | 0.39       | 1.57      | NR                   | NR    | NR   |                                |
| Wang et al., 2021            | Arterial aneurysm/dissection  | FAERS                                | Sorafenib              | ROR              | 1.41                                      | 1.02       | 1.93      | NR                   | NR    | NR   |                                |
| Wang et al., 2021            | Arterial aneurysm/dissection  | FAERS                                | Sunitinib              | ROR              | 1.99                                      | 1.59       | 2.36      | NR                   | NR    | NR   |                                |
| Wang et al., 2021            | Arterial aneurysm/dissection  | FAERS                                | Vandetanib             | ROR              | 1.57                                      | 0.39       | 6.29      | NR                   | NR    | NR   |                                |
| Crini et al., 2021           | Cardiac failure               | FAERS                                | Ponatinib              | ROR              | 1.8                                       | 1.4        | 2.4       | 48                   | 13    | 199  |                                |
| Cutroneo et al., 2017        | Cardiac failure               | Italian spontaneous reporting system | Bevacizumab            | PRR              | 4.69                                      | 3.24       | 6.79      | NR                   | NR    | NR   |                                |
| De Campigneulle et al., 2021 | Cardiac failure               | VigiBase                             | Sunitinib              | ROR              | 1.97                                      | 1.51       | 1.84      | NR                   | NR    | NR   |                                |
| Goldman et al., 2021         | Cardiac failure               | FAERS                                | Axitinib               | ROR              | 1.09                                      | 0.85       | 1.4       | NR                   | NR    | NR   |                                |
| Goldman et al., 2021         | Cardiac failure               | FAERS                                | Cabozantinib           | ROR              | 0.7                                       | 0.57       | 0.85      | NR                   | NR    | NR   |                                |
| Goldman et al., 2021         | Cardiac failure               | FAERS                                | Lemnatinib             | ROR              | 2.21                                      | 1.5        | 3.27      | NR                   | NR    | NR   |                                |
| Goldman et al., 2021         | Cardiac failure               | FAERS                                | Pazopanib              | ROR              | 1.1                                       | 0.96       | 1.26      | NR                   | NR    | NR   |                                |
| Goldman et al., 2021         | Cardiac failure               | FAERS                                | Sunitinib              | ROR              | 2.01                                      | 1.68       | 2.4       | NR                   | NR    | NR   |                                |
| Gouvenneur et al., 2017      | Cardiac failure               | VigiBase                             | Aflibercept (>75 anni) | PRR              | 1.5                                       |            |           | 0.81                 | 2.78  | NR   |                                |
| Gouvenneur et al., 2017      | Cardiac failure               | VigiBase                             | Aflibercept (>75 anni) | PRR              | not reached (less of three serious cases) |            |           |                      |       | NR   |                                |
| Gouvenneur et al., 2017      | Cardiac failure               | VigiBase                             | Bevacizumab (>75 anni) | PRR              | 0.65                                      | 0.51       | 0.83      | NR                   | NR    | NR   |                                |
| Gouvenneur et al., 2017      | Cardiac failure               | VigiBase                             | Bevacizumab (>75 anni) | PRR              | 0.77                                      | 0.53       | 1.13      | NR                   | NR    | NR   |                                |
| Gouvenneur et al., 2017      | Cardiac failure               | VigiBase                             | Regorafenib (>75 anni) | PRR              | 0.29                                      | 0.16       | 0.52      | NR                   | NR    | NR   |                                |
| Gouvenneur et al., 2017      | Cardiac failure               | VigiBase                             | Regorafenib (>75 anni) | PRR              | 0.66                                      | 0.34       | 1.26      | NR                   | NR    | NR   |                                |
| Crini et al., 2021           | Cardiac arrhythmia            | FAERS                                | Ponatinib              | ROR              | 1                                         | 0.5        | 2.2       | NR                   | NR    | NR   |                                |
| Cutroneo et al., 2017        | Cardiac arrhythmia            | Italian spontaneous reporting system | Bevacizumab            | PRR              | 0.75                                      | 0.45       | 1.27      | NR                   | NR    | NR   |                                |
| Ye et al., 2021              | Cardiac arrhythmia            | FAERS                                | Axitinib               | ROR              | 1.12                                      | 0.76       | 1.63      | NR                   | NR    | NR   |                                |
| Ye et al., 2021              | Cardiac arrhythmia            | FAERS                                | Cabozantinib           | ROR              | 0.74                                      | 0.48       | 1.14      | NR                   | NR    | NR   |                                |
| Ye et al., 2021              | Cardiac arrhythmia            | FAERS                                | Lemnatinib             | ROR              | 0.98                                      | 0.68       | 1.4       | NR                   | NR    | NR   |                                |
| Ye et al., 2021              | Cardiac arrhythmia            | FAERS                                | Nintedanib             | ROR              | 0.61                                      | 0.48       | 0.77      | NR                   | NR    | NR   |                                |
| Ye et al., 2021              | Cardiac arrhythmia            | FAERS                                | Pazopanib              | ROR              | 0.68                                      | 0.47       | 0.97      | NR                   | NR    | NR   |                                |
| Ye et al., 2021              | Cardiac arrhythmia            | FAERS                                | Regorafenib            | ROR              | 1.3                                       | 0.87       |           | NR                   | NR    | NR   |                                |
| Ye et al., 2021              | Cardiac arrhythmia            | FAERS                                | Sorafenib              | ROR              | 0.62                                      | 0.4        | 0.96      | NR                   | NR    | NR   |                                |
| Ye et al., 2021              | Cardiac arrhythmia            | FAERS                                | Sunitinib              | ROR              | 0.55                                      | 0.41       | 0.72      | NR                   | NR    | NR   |                                |
| Ye et al., 2021              | Cardiac arrhythmia            | FAERS                                | Ponatinib              | ROR              | 1.03                                      | 0.21       | 4.14      | NR                   | NR    | NR   |                                |
| Wittayanukorn et al., 2021   | Cardiotoxicity                | FAERS                                | Bevacizumab            | ROR              | 3.17                                      | 2.7        | 3.71      | NR                   | NR    | NR   |                                |
| Wittayanukorn et al., 2021   | Cardiotoxicity                | FAERS                                | Lapatinib              | ROR              | 1.2                                       | 1.01       | 1.41      | NR                   | NR    | NR   |                                |
| Wittayanukorn et al., 2021   | Cardiotoxicity                | FAERS                                | Bevacizumab + Cycloph  | ROR              | 6.71                                      | 5.1        |           | NR                   | NR    | NR   |                                |
| Wittayanukorn et al., 2021   | Cardiotoxicity                | FAERS                                | Bevacizumab + Dose     | ROR              | 8.76                                      | 6.3        | 12.18     | NR                   | NR    | NR   |                                |
| Crini et al., 2021           | Cardiomyopathy                | FAERS                                | Ponatinib              | ROR              | 0.6                                       | 0.3        | 1.2       | NR                   | NR    | NR   |                                |
| Cutroneo et al., 2017        | Cardiomyopathy                | Italian spontaneous reporting system | Bevacizumab            | PRR              | 4.74                                      | 2.24       | 10.04     | NR                   | NR    | NR   |                                |
| Goldman et al., 2021         | Cardiomyopathy                | FAERS                                | Axitinib               | ROR              | 1.7                                       | 0.71       | 4.09      | NR                   | NR    | NR   |                                |
| Goldman et al., 2021         | Cardiomyopathy                | FAERS                                | Cabozantinib           | ROR              | 1.04                                      | 0.5        | 2.19      | NR                   | NR    | NR   |                                |
| Goldman et al., 2021         | Cardiomyopathy                | FAERS                                | Lemnatinib             | ROR              | 1.63                                      | 0.73       | 3.63      | NR                   | NR    | NR   |                                |
| Goldman et al., 2021         | Cardiomyopathy                | FAERS                                | Pazopanib              | ROR              | 2.51                                      | 1.68       | 3.75      | NR                   | NR    | NR   |                                |
| Goldman et al., 2021         | Cardiomyopathy                | FAERS                                | Sunitinib              | ROR              | 1.81                                      | 1.14       | 2.88      | NR                   | NR    | NR   |                                |
| Crini et al., 2021           | Ischemic heart disease        | FAERS                                | Ponatinib              | ROR              | 2.9                                       | 2.5        | 2.4       | 280.5                | 75    | 265  |                                |
| Cutroneo et al., 2017        | Ischemic heart disease        | Italian spontaneous reporting system | Bevacizumab            | PRR              | 5.63                                      | 3.98       | 7.96      | NR                   | NR    | NR   |                                |
| Goldman et al., 2021         | Ischemic heart disease        | FAERS                                | Axitinib               | ROR              | 1.03                                      | 0.82       | 1.28      | NR                   | NR    | NR   |                                |
| Goldman et al., 2021         | Ischemic heart disease        | FAERS                                | Cabozantinib           | ROR              | 0.51                                      | 0.41       | 0.62      | NR                   | NR    | NR   |                                |
| Goldman et al., 2021         | Ischemic heart disease        | FAERS                                | Lemnatinib             | ROR              | 1.41                                      | 1.19       | 1.67      | NR                   | NR    | NR   |                                |
| Goldman et al., 2021         | Ischemic heart disease        | FAERS                                | Pazopanib              | ROR              | 0.66                                      | 0.56       | 0.76      | NR                   | NR    | NR   |                                |
| Goldman et al., 2021         | Ischemic heart disease        | FAERS                                | Sunitinib              | ROR              | 0.74                                      | 0.64       | 0.85      | NR                   | NR    | NR   |                                |
| Gouvenneur et al., 2017      | Ischemic heart disease        | VigiBase                             | Aflibercept (>75 anni) | PRR              | 0.61                                      | 0.34       | 1.1       | NR                   | NR    | NR   |                                |
| Gouvenneur et al., 2017      | Ischemic heart disease        | VigiBase                             | Aflibercept (>75 anni) | PRR              | 1.42                                      | 0.54       | 3.69      | NR                   | NR    | NR   |                                |
| Gouvenneur et al., 2017      | Ischemic heart disease        | VigiBase                             | Bevacizumab (>75 anni) | PRR              | 0.82                                      | 0.72       | 0.94      | NR                   | NR    | NR   |                                |
| Gouvenneur et al., 2017      | Ischemic heart disease        | VigiBase                             | Bevacizumab (>75 anni) | PRR              | 1.12                                      | 0.86       | 1.47      | NR                   | NR    | NR   |                                |
| Gouvenneur et al., 2017      | Ischemic heart disease        | VigiBase                             | Regorafenib (>75 anni) | PRR              | 0.83                                      | 0.68       | 1.03      | NR                   | NR    | NR   |                                |
| Gouvenneur et al., 2017      | Ischemic heart disease        | VigiBase                             | Regorafenib (>75 anni) | PRR              | 0.78                                      | 0.47       | 1.31      | NR                   | NR    | NR   |                                |
| Guyon et al., 2021           | Cerebral aneurysm             | VigiBase                             | Axitinib               | PRR              | 2.52                                      | 1.04       | 6.08      | NR                   | NR    | NR   |                                |
| Guyon et al., 2021           | Cerebral aneurysm             | VigiBase                             | Bevacizumab            | PRR              | 3.76                                      | 2.92       | 4.84      | NR                   | NR    | NR   |                                |
| Goldman et al., 2021         | Cerebral hemorrhages          | VigiBase                             | Sunitinib              | PRR              | 1.89                                      | 1.19       | 2.99      | NR                   | NR    | NR   |                                |
| Goldman et al., 2021         | Cerebral hemorrhages          | FAERS                                | Axitinib               | ROR              | 1.15                                      | 0.8        | 1.65      | NR                   | NR    | NR   |                                |
| Goldman et al., 2021         | Cerebral hemorrhages          | FAERS                                | Cabozantinib           | ROR              | 0.62                                      | 0.45       | 0.86      | NR                   | NR    | NR   |                                |
| Goldman et al., 2021         | Cerebral hemorrhages          | FAERS                                | Lemnatinib             | ROR              | 3.32                                      | 2.74       | 4.02      | NR                   | NR    | NR   |                                |
| Goldman et al., 2021         | Cerebral hemorrhages          | FAERS                                | Pazopanib              | ROR              | 0.85                                      | 0.67       | 1.07      | NR                   | NR    | NR   |                                |
| Goldman et al., 2021         | Cerebral hemorrhages          | FAERS                                | Sunitinib              | ROR              | 0.79                                      | 0.63       | 1         | NR                   | NR    | NR   |                                |
| Goldman et al., 2021         | Cerebral ischemia             | FAERS                                | Axitinib               | ROR              | 1.53                                      | 1.25       | 1.88      | NR                   | NR    | NR   |                                |
| Goldman et al., 2021         | Cerebral ischemia             | FAERS                                | Cabozantinib           | ROR              | 0.81                                      | 0.67       | 0.97      | NR                   | NR    | NR   |                                |
| Goldman et al., 2021         | Cerebral ischemia             | FAERS                                | Lemnatinib             | ROR              | 2.19                                      | 1.87       | 2.55      | NR                   | NR    | NR   |                                |
| Goldman et al., 2021         | Cerebral ischemia             | FAERS                                | Pazopanib              | ROR              | 0.83                                      | 0.72       | 0.97      | NR                   | NR    | NR   |                                |
| Goldman et al., 2021         | Cerebral ischemia             | FAERS                                | Sunitinib              | ROR              | 0.81                                      | 0.69       | 0.94      | NR                   | NR    | NR   |                                |
| Cutroneo et al., 2017        | CNS vascular disorders        | Italian spontaneous reporting system | Bevacizumab            | PRR              | 2.44                                      | 1.2        | 1.97      | 1.2                  |       |      |                                |
| Crini et al., 2021           | Embolic and thrombotic events | FAERS                                | Ponatinib              | ROR              | 1.4                                       | 1.2        | 1.6       | NR                   | NR    | NR   |                                |
| Cutroneo et al., 2017        | Embolic and thrombotic events | Italian spontaneous reporting system | Aflibercept            | PRR              | 4.38                                      | 2.01       | 9.57      | NR                   | NR    | NR   |                                |
| Cutroneo et al., 2017        | Embolic and thrombotic events | Italian spontaneous reporting system | Bevacizumab            | PRR              | 15.38                                     | 13.78      | 16.73     | NR                   | NR    | NR   |                                |
| Goldman et al., 2021         | Arterial embolic events       | FAERS                                | Axitinib               | ROR              | 0.67                                      | 0.32       | 1.42      | NR                   | NR    | NR   |                                |
| Goldman et al., 2021         | Arterial embolic events       | FAERS                                | Cabozantinib           | ROR              | 0.63                                      | 0.38       | 1.05      | NR                   | NR    | NR   |                                |
| Goldman et al., 2021         | Arterial embolic events       | FAERS                                | Lemnatinib             | ROR              | 1.23                                      | 0.75       | 2.01      | NR                   | NR    | NR   |                                |
| Goldman et al., 2021         | Arterial embolic events       | FAERS                                | Pazopanib              | ROR              | 0.83                                      | 0.57       | 1.2       | NR                   | NR    | NR   |                                |
| Goldman et al., 2021         | Arterial embolic events       | FAERS                                | Sunitinib              | ROR              | 1.34                                      | 1.01       | 1.79      | NR                   | NR    | NR   |                                |
| Goldman et al., 2021         | Venous embolic events         | FAERS                                | Axitinib               | ROR              | 0.85                                      | 0.61       | 1.19      | NR                   | NR    | NR   |                                |
| Goldman et al., 2021         | Venous embolic events         | FAERS                                | Cabozantinib           | ROR              | 1.78                                      | 1.52       | 2.07      | NR                   | NR    | NR   |                                |
| Goldman et al., 2021         | Venous embolic events         | FAERS                                | Lemnatinib             | ROR              | 2.79                                      | 2.36       | 3.3       | NR                   | NR    | NR   |                                |
| Goldman et al., 2021         | Venous embolic events         | FAERS                                | Pazopanib              | ROR              | 0.69                                      | 0.57       | 0.85      | NR                   | NR    | NR   |                                |
| Goldman et al., 2021         | Venous embolic events         | FAERS                                | Sunitinib              | ROR              | 1.19                                      | 1.02       | 1.39      | NR                   | NR    | NR   |                                |
| Crini et al., 2021           | Hypertension                  | FAERS                                | Ponatinib              | ROR              | 3.5                                       | 2.9        | 4.3       | NR                   | NR    | NR   |                                |
| Cutroneo et al., 2017        | Hypertension                  | Italian spontaneous reporting system | Aflibercept            | PRR              | 10.09                                     | 6.39       | 15.95     | NR                   | NR    | NR   |                                |
| Cutroneo et al., 2017        | Hypertension                  | Italian spontaneous reporting system | Bevacizumab            | PRR              | 11.14                                     | 10.01      | 12.39     | NR                   | NR    | NR   |                                |
| Goldman et al., 2021         | Hypertension                  | FAERS                                | Lemnatinib             | ROR              | 16.74                                     | 15.7       | 17.7      | NR                   | NR    | NR   |                                |
| Goldman et al., 2021         | Hypertension                  | FAERS                                | Axitinib               | ROR              | 6.5                                       | 5.93       | 7.13      | NR                   | NR    | NR   |                                |
| Goldman et al., 2021         | Hypertension                  | FAERS                                | Sunitinib              | ROR              | 5.75                                      | 4.45       |           |                      |       |      |                                |

## Figure S2

### Other Adverse events reported in SRSs studies

| Reference            | ADR                      | Database | Drug         | Type of analysis | Disproportionality value | 95% CI LOW | 95% CI UP | Time to onset (days) | Range |     |
|----------------------|--------------------------|----------|--------------|------------------|--------------------------|------------|-----------|----------------------|-------|-----|
| Yoshida et al., 2022 | Hand-foot syndrome       | JADER    | Axitinib     | ROR              | 14.9                     | 11.1       | 20.1      | NR                   | NR    | NR  |
| Yoshida et al., 2022 | Hand-foot syndrome       | JADER    | Bevacizumab  | ROR              | 1.6                      | 1.2        | 2.1       | NR                   | NR    | NR  |
| Yoshida et al., 2022 | Hand-foot syndrome       | JADER    | Lapatinib    | ROR              | 130.4                    | 110.7      | 153.6     | NR                   | NR    | NR  |
| Yoshida et al., 2022 | Hand-foot syndrome       | JADER    | Lenvatinib   | ROR              | 4.2                      | 2.8        | 6.4       | NR                   | NR    | NR  |
| Yoshida et al., 2022 | Hand-foot syndrome       | JADER    | Pazopanib    | ROR              | 6.1                      | 4.3        | 8.7       | NR                   | NR    | NR  |
| Yoshida et al., 2022 | Hand-foot syndrome       | JADER    | Regorafenib  | ROR              | 63.3                     | 55.2       | 72.6      | 9                    | 6     | 14  |
| Yoshida et al., 2022 | Hand-foot syndrome       | JADER    | Sorafenib    | ROR              | 29                       | 25.8       | 32.7      | 9                    | 6     | 14  |
| Yoshida et al., 2022 | Hand-foot syndrome       | JADER    | Sunitinib    | ROR              | 13.9                     | 11.7       | 16.5      | NR                   | NR    | NR  |
| Zhang et al., 2015   | Osteonecrosis of the jaw | FAERS    | Axitinib     | ROR              | 0.8                      | 0.4        | 1.5       | NR                   | NR    | NR  |
| Zhang et al., 2015   | Osteonecrosis of the jaw | FAERS    | Bevacizumab  | ROR              | 4.5                      | 4.2        | 4.9       | NR                   | NR    | NR  |
| Zhang et al., 2015   | Osteonecrosis of the jaw | FAERS    | Pazopanib    | ROR              | 1.3                      | 0.7        | 2.5       | NR                   | NR    | NR  |
| Zhang et al., 2015   | Osteonecrosis of the jaw | FAERS    | Sorafenib    | ROR              | 1.5                      | 1.2        | 1.9       | NR                   | NR    | NR  |
| Zhang et al., 2015   | Osteonecrosis of the jaw | FAERS    | Sunitinib    | ROR              | 4.6                      | 4.2        | 5.1       | NR                   | NR    | NR  |
| Liao et al., 2021    | Hyperthyroidism          | FAERS    | Axitinib     | ROR              | 1.79                     | 1.08       | 2.98      | NR                   | NR    | NR  |
| Liao et al., 2021    | Hyperthyroidism          | FAERS    | Cabozantinib | ROR              | 2.8                      | 2.04       | 3.83      | NR                   | NR    | NR  |
| Liao et al., 2021    | Hyperthyroidism          | FAERS    | Lenvatinib   | ROR              | 3.28                     | 2.23       | 4.82      | NR                   | NR    | NR  |
| Liao et al., 2021    | Hyperthyroidism          | FAERS    | Pazopanib    | ROR              | 2.94                     | 2.29       | 3.79      | NR                   | NR    | NR  |
| Liao et al., 2021    | Hyperthyroidism          | FAERS    | Ponatinib    | ROR              | 2                        | 1.14       | 3.54      | 343                  | 135   | 596 |
| Liao et al., 2021    | Hyperthyroidism          | FAERS    | Regorafenib  | ROR              | 2.55                     | 1.58       | 4.11      | 11                   | 5     | 39  |
| Liao et al., 2021    | Hyperthyroidism          | FAERS    | Sorafenib    | ROR              | 1.72                     | 1.19       | 2.48      | NR                   | NR    | NR  |
| Liao et al., 2021    | Hyperthyroidism          | FAERS    | Sunitinib    | ROR              | 2.78                     | 2.27       | 3.42      | NR                   | NR    | NR  |
| Liao et al., 2021    | Hyperthyroidism          | FAERS    | Vandetanib   | ROR              | -                        |            |           | NR                   | NR    | NR  |
| Liao et al., 2021    | Hypothyroidism           | FAERS    | Axitinib     | ROR              | 7.44                     | 6.09       | 9.09      | NR                   | NR    | NR  |
| Liao et al., 2021    | Hypothyroidism           | FAERS    | Cabozantinib | ROR              | 5.54                     | 4.63       | 6.63      | NR                   | NR    | NR  |
| Liao et al., 2021    | Hypothyroidism           | FAERS    | Lenvatinib   | ROR              | 13.47                    | 11.54      | 15.72     | 12                   | 4     | 32  |
| Liao et al., 2021    | Hypothyroidism           | FAERS    | Pazopanib    | ROR              | 2.71                     | 1.01       | 7.23      | NR                   | NR    | NR  |
| Liao et al., 2021    | Hypothyroidism           | FAERS    | Ponatinib    | ROR              | 2.86                     | 1.96       | 4.18      | 429                  | 46    | 947 |
| Liao et al., 2021    | Hypothyroidism           | FAERS    | Regorafenib  | ROR              | 3.52                     | 2.55       | 4.87      | NR                   | NR    | NR  |
| Liao et al., 2021    | Hypothyroidism           | FAERS    | Sorafenib    | ROR              | 3.09                     | 2.48       | 3.84      | NR                   | NR    | NR  |
| Liao et al., 2021    | Hypothyroidism           | FAERS    | Sunitinib    | ROR              | 11.53                    | 10.6       | 12.54     | NR                   | NR    | NR  |
| Liao et al., 2021    | Hypothyroidism           | FAERS    | Vandetanib   | ROR              | 2.71                     | 1.01       | 7.23      | NR                   | NR    | NR  |
